# Supplementary material for: Efficacy of a Fatty Acids Dietary Supplement in a Polyethylene Glycol-Induced Mouse Model of Retinal Degeneration
Source: MDPI journal article supplement (doi:10.3390/nu9101079), 2017-09-29
Supplement: s1 [file s1]

**Figure S1.** Schematic diagram depicting the experimental groups involved in the study.

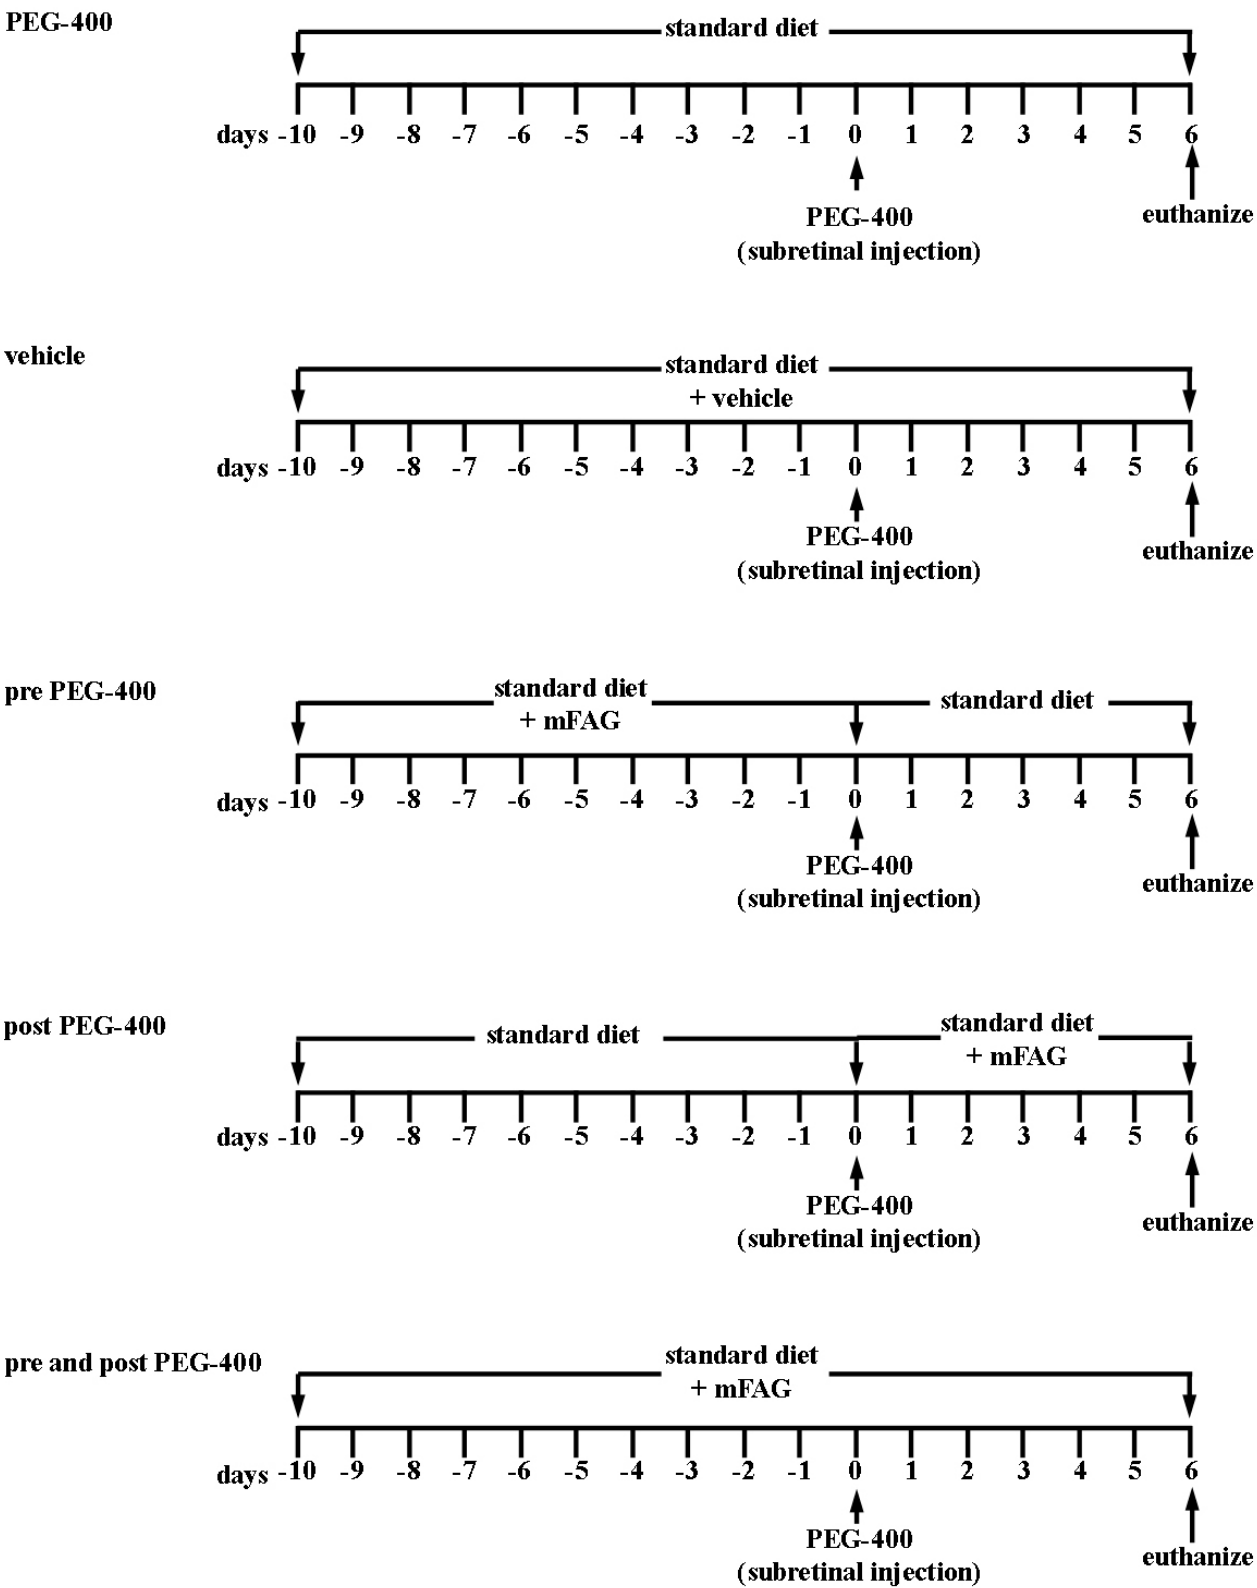

**Table S1.** Sequences of primer sets used for qRT-PCR experiments.

| Gene          | Primer sequence (5' → 3') |                        |
|---------------|---------------------------|------------------------|
|               | Forward Primer            | Reverse Primer         |
| <i>C3</i>     | CCAGCTCCCCATTAGCTCTG      | CCAGCTCCCCATTAGCTCTG   |
| <i>C5</i>     | GAACAAACCTACGTCATTTACAGC  | GTCAACAGTGCCGCGTTTT    |
| <i>VEGF</i>   | GCACATAGGAGAGATGAGCTTCC   | CTCCGCTCTGAACAAGGCT    |
| <i>TNF-α</i>  | GCCTCTTCTCATTCTGCTT       | CTCCTCCACTTGGTGGTTTG   |
| <i>IL-1β</i>  | TCCTTG TGCAAGTGTCTGAAGC   | ATGAGTGATACTGCCTGCCTGA |
| <i>IL-6</i>   | TCTGCAAGAGACTTCCATCCAGT   | TCTGCAACTGCATCATCGTTGT |
| <i>IL-8</i>   | ACTTTCAGAGACAGCAGAGC      | GTGGTCCACTCTCAATCACT   |
| <i>ICAM-1</i> | CGCTGTGCTTTGAGAACTGTG     | ATACACGGTGATGGTAGCGGA  |
| <i>iNOS</i>   | GGCAAACCCAAGGTCTACGTT     | TCGCTCAAGTTCAGCTTGGT   |
| <i>GFAP</i>   | CGGAGACGCATCACCTCTG       | AGGGAGTGGAGGAGTCATTCTG |
| <i>CD68</i>   | TGTCTGATCTTGCTAGGACCG     | GAGAGTAACGGCCTTTTTGTGA |
| <i>F4/80</i>  | TGACTCACCTTGTGGTCCTAA     | CTTCCCAGAATCCAGTCTTTCC |
| <i>Rpl13a</i> | CACTCTGGAGGAGAAACGGAAGG   | GCAGGCATGAGGCAAACAGTC  |
